# Supplementary material for: Smartphone-integrated sensing platform based on a “one-stone-three-birds” strategy for real-time quantitative detection of Ag(i) ions
Source: Royal Society of Chemistry journal article supplement (doi:10.1039/d6ra02021f), 2026-03-31
Supplement: d6ra02021f1.pdf [file d6ra02021f1.pdf]

## **Supporting Information**

*of*

### **Smartphone-Integrated Sensing Platform Based on a “One-Stone-Three-Birds” Strategy for Real-Time Quantitative Detection of Ag(I) Ions**

Lihua Zhang,\* Jiang Li, Tengyan Gao, Wei Liu, Zirui Zhang, Zezhong Chen, Feng Feng\*

Shanxi Provincial Key Laboratory of Chemical Biosensing, School of Chemistry and Chemical Engineering, Shanxi Datong University, Datong 037009, China

\* Corresponding author: Lihua Zhang, E-mail: [lihuazhang888@163.com](mailto:lihuazhang888@163.com);

Feng Feng, E-mail: [feng-feng64@263.net](mailto:feng-feng64@263.net);

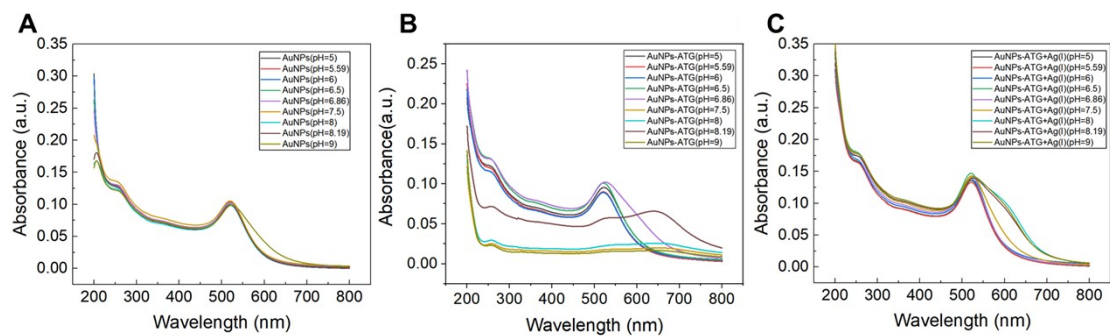

**Figure S1.** Effect of pH on (A) AuNPs, (B) AuNPs-ATG, and (C) AuNPs-ATG+Ag(I).
